# Supplementary material
Source: PubMed Central journal article supplement (PMC4292862)
Supplement: Supp_Fig1.pdf [file Supp_Fig1.pdf]

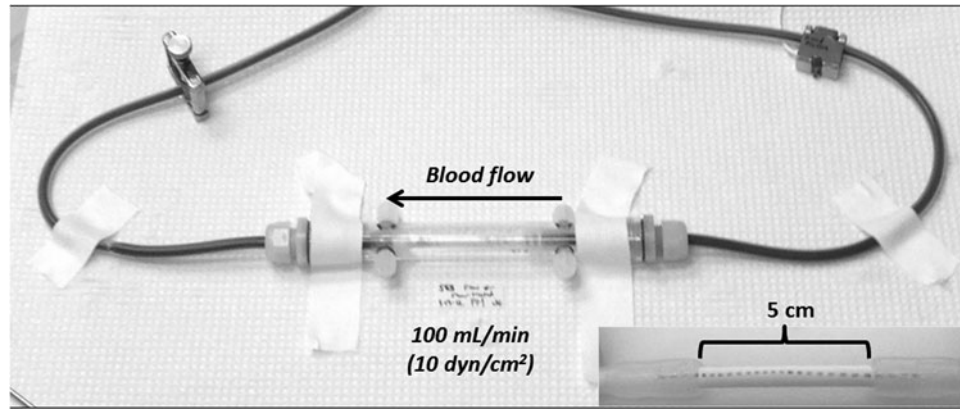

**SUPPLEMENTARY FIG. S1.** A cell-seeded ePTFE vascular graft connected to the baboon arteriovenous shunt loop. Vascular grafts 5 cm in length are connected to a silicone tubing (inset) for connection to the shunt loop. Blood flows from the femoral artery of the baboon, through the graft, and back into the femoral vein. The blood flow rate is monitored with a Transonic flow probe and held constant at 100 mL/min by a clamp downstream of the graft. ePTFE, expanded polytetrafluoroethylene.
