# Supplementary material
Source: PubMed Central journal article supplement (PMC4292862)
Supplement: Supp_Fig2.pdf [file Supp_Fig2.pdf]

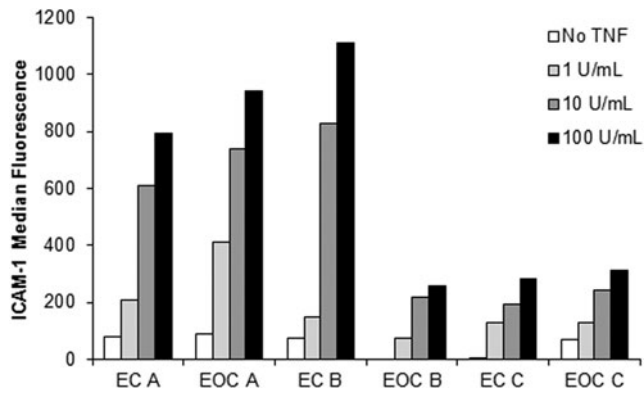

**SUPPLEMENTARY FIG. S2.** ICAM-1 expression of TNF $\alpha$ -treated ECs and EOCs measured by flow cytometry. Each individual donor showed the expected dose-dependent upregulation of ICAM-1 induced by TNF $\alpha$  treatment. Large differences between donors were observed, with some cells being much more responsive to TNF $\alpha$  treatment. ECs, endothelial cells; EOCs, endothelial outgrowth cells; ICAM-1, intercellular adhesion molecule 1; TNF $\alpha$ , tumor necrosis factor  $\alpha$ .
