# Supplementary material
Source: PubMed Central journal article supplement (PMC4292862)
Supplement: Supp_Fig3.pdf [file Supp_Fig3.pdf]

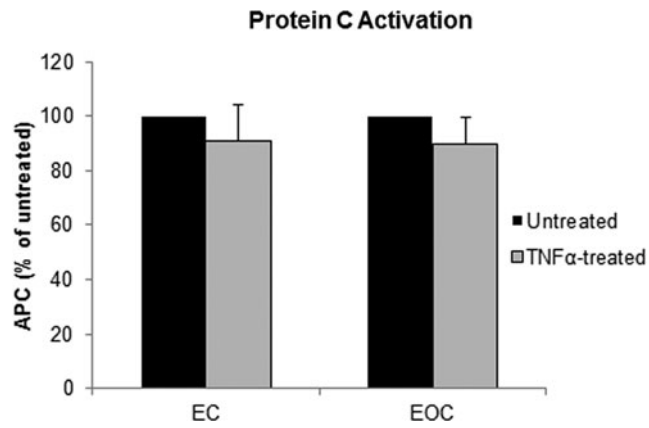

**SUPPLEMENTARY FIG. S3.** APC generation of TNF $\alpha$ -treated ECs and EOCs normalized to untreated cells. Both ECs and EOCs consistently reduced protein C activation following TNF $\alpha$  treatment, although the degree of TNF  $\alpha$ -induced reduction varied between donors. Decreases in protein C activation were not significant between untreated and treated (paired *t*-test,  $p=0.094$  for ECs,  $p=0.10$  for EOCs,  $n=8$ , analysis performed before normalization). APC, activated protein C.
